# Supplementary material
Source: PubMed Central journal article supplement (PMC5831438)
Supplement: jamasurg-152-780-s001.pdf [file jamasurg-152-780-s001.pdf]

## Supplementary Online Content

Ali AM, Loeffler MD, Aylin P, Bottle A. Factors associated with 30-day readmission after primary total hip arthroplasty: analysis of 514 455 procedures in the UK National Health Service. *JAMA Surg*. Published online October 4, 2017.  
doi:10.1001/jamasurg.2017.3949

**eTable 1:** Characteristics of Patients Undergoing Hip Replacement and of Patients Readmitted Within 30 Days of Discharge (All-cause, Surgical, RTT)

**eTable 2:** Results of Multiple Logistic Regression Analysis for Patient-Related Predictors of 30-day Readmission (All-cause, Surgical and RTT)

**eAppendix 1.** OPCS Procedure Codes Used to Identify Primary Total Hip Arthroplasty

**eAppendix 2.** Primary ICD-10 Diagnostic Codes Used to Define 'Surgical' Causes of Readmission

This supplementary material has been provided by the authors to give readers additional information about their work.

**eTable 1:** Characteristics of Patients Undergoing Hip Replacement and of Patients Readmitted Within 30 Days of Discharge (All-cause, Surgical, RTT)

|                             | Number of patients | % of total index ops | All-cause readmissions |      | Surgical readmissions |     | RTT readmissions |     |
|-----------------------------|--------------------|----------------------|------------------------|------|-----------------------|-----|------------------|-----|
|                             |                    |                      | Number                 | %    | Number                | %   | Number           | %   |
| Age 0-39                    | 10902              | 2.1                  | 525                    | 4.8  | 335                   | 3.1 | 76               | 0.7 |
| Age 40-49                   | 25664              | 5.0                  | 1169                   | 4.6  | 729                   | 2.8 | 160              | 0.6 |
| Age 50-59                   | 72574              | 14.1                 | 3290                   | 4.5  | 2048                  | 2.8 | 483              | 0.7 |
| Age 60-69                   | 152004             | 29.5                 | 7675                   | 5.0  | 4547                  | 3.0 | 1210             | 0.8 |
| Age 70-79                   | 175694             | 34.2                 | 11143                  | 6.3  | 5922                  | 3.4 | 1570             | 0.9 |
| Age 80+                     | 77617              | 15.1                 | 6687                   | 8.6  | 2918                  | 3.8 | 787              | 1.0 |
| Females                     | 307227             | 59.7                 | 17037                  | 5.5  | 9156                  | 3.0 | 2300             | 0.7 |
| Males                       | 207228             | 40.3                 | 13452                  | 6.5  | 7343                  | 3.5 | 1986             | 1.0 |
| Resurfacing                 | 16297              | 3.2                  | 787                    | 4.8  | 505                   | 3.1 | 79               | 0.5 |
| Hybrid                      | 76267              | 14.8                 | 4270                   | 5.6  | 2254                  | 3.0 | 638              | 0.8 |
| Not cemented                | 203440             | 39.5                 | 11250                  | 5.5  | 6348                  | 3.1 | 1611             | 0.8 |
| Cemented                    | 218451             | 42.5                 | 14182                  | 6.5  | 7392                  | 3.4 | 1958             | 0.9 |
| RTT during index            | 3089               | 0.6                  | 467                    | 15.1 | 297                   | 9.6 | 166              | 5.4 |
| Diabetes Mellitus           | 49378              | 9.6                  | 3702                   | 7.5  | 1835                  | 3.7 | 536              | 1.1 |
| Hypertension                | 231060             | 44.9                 | 15553                  | 6.7  | 8045                  | 3.5 | 2237             | 1.0 |
| Arrhythmias                 | 44857              | 8.7                  | 3952                   | 8.8  | 1733                  | 3.9 | 499              | 1.1 |
| Valvular disease            | 12751              | 2.5                  | 1130                   | 8.9  | 492                   | 3.9 | 130              | 1.0 |
| Congestive Heart Failure    | 8269               | 1.6                  | 881                    | 10.7 | 326                   | 3.9 | 81               | 1.0 |
| Peripheral Vascular Disease | 7522               | 1.5                  | 769                    | 10.2 | 334                   | 4.4 | 85               | 1.1 |
| Chronic lung disease        | 68816              | 13.4                 | 5493                   | 8.0  | 2835                  | 4.1 | 688              | 1.0 |
| Lung circulation disorders  | 2339               | 0.5                  | 243                    | 10.4 | 98                    | 4.2 | 33               | 1.4 |
| Cancer without metastasis   | 9381               | 1.8                  | 763                    | 8.1  | 327                   | 3.5 | 91               | 1.0 |
| Cancer with metastasis      | 1875               | 0.4                  | 189                    | 10.1 | 47                    | 2.5 | 15               | 0.8 |
| Renal disease               | 20296              | 3.9                  | 1762                   | 8.7  | 674                   | 3.3 | 194              | 1.0 |
| Dementia                    | 1858               | 0.4                  | 218                    | 11.7 | 85                    | 4.6 | 34               | 1.8 |
| Psychoses                   | 960                | 0.2                  | 107                    | 11.1 | 62                    | 6.5 | 20               | 2.1 |
| Alcohol abuse               | 7639               | 1.5                  | 622                    | 8.1  | 352                   | 4.6 | 104              | 1.4 |
| Drug abuse                  | 732                | 0.1                  | 58                     | 7.9  | 39                    | 5.3 | 17               | 2.3 |
| Depression                  | 16164              | 3.1                  | 1216                   | 7.5  | 654                   | 4.0 | 213              | 1.3 |
| Other mental health dx      | 5329               | 1.0                  | 371                    | 7.0  | 187                   | 3.5 | 58               | 1.1 |
| Any mental health dx        | 30427              | 5.9                  | 2282                   | 7.5  | 1224                  | 4.0 | 380              | 1.2 |
| Living alone                | 7543               | 1.5                  | 629                    | 8.3  | 309                   | 4.1 | 80               | 1.1 |
| Liver disease               | 3096               | 0.6                  | 297                    | 9.6  | 160                   | 5.2 | 54               | 1.7 |
| Peptic ulcer                | 2083               | 0.4                  | 197                    | 9.5  | 100                   | 4.8 | 27               | 1.3 |

|                                 |       |     |      |      |      |     |     |     |
|---------------------------------|-------|-----|------|------|------|-----|-----|-----|
| Paraplegia                      | 1395  | 0.3 | 150  | 10.8 | 75   | 5.4 | 22  | 1.6 |
| Blood loss anaemia              | 366   | 0.1 | 24   | 6.6  | 11   | 3.0 | 3   | 0.8 |
| Deficiency anaemia              | 7400  | 1.4 | 658  | 8.9  | 288  | 3.9 | 63  | 0.9 |
| Coagulopathy                    | 2382  | 0.5 | 259  | 10.9 | 141  | 5.9 | 29  | 1.2 |
| Weight loss                     | 1640  | 0.3 | 157  | 9.6  | 67   | 4.1 | 13  | 0.8 |
| Fluid and electrolyte disorders | 8952  | 1.7 | 943  | 10.5 | 356  | 4.0 | 106 | 1.2 |
| Hypothyroidism                  | 34413 | 6.7 | 2246 | 6.5  | 1155 | 3.4 | 286 | 0.8 |
| Obesity                         | 37885 | 7.4 | 2339 | 6.2  | 1380 | 3.6 | 446 | 1.2 |
| Other neuro diseases            | 9587  | 1.9 | 879  | 9.2  | 423  | 4.4 | 140 | 1.5 |
| Rheumatic disorders             | 23832 | 4.6 | 1731 | 7.3  | 899  | 3.8 | 250 | 1.0 |
| Previous pneumonia              | 2219  | 0.4 | 269  | 12.1 | 106  | 4.8 | 35  | 1.6 |
| Previous stroke                 | 855   | 0.2 | 78   | 9.1  | 27   | 3.2 | 6   | 0.7 |
| Previous AMI                    | 750   | 0.1 | 77   | 10.3 | 38   | 5.1 | 6   | 0.8 |
| Frailty indicator               | 47040 | 9.1 | 3932 | 8.4  | 1901 | 4.0 | 614 | 1.3 |

**eTable 2:** Results of Multiple Logistic Regression Analysis for Patient-Related Predictors of 30-day Readmission (All-cause, Surgical and RTT)  
**Green= significant reduction in risk, Red= significant increase in risk**

| Patient factor                       |                     | All-cause readmissions |                     | Surgical readmissions |                     | RTT readmissions    |                     |                     |        |
|--------------------------------------|---------------------|------------------------|---------------------|-----------------------|---------------------|---------------------|---------------------|---------------------|--------|
|                                      |                     | OR (95% CI)            | P value             | OR (95% CI)           | P value             | OR (95% CI)         | P value             |                     |        |
| Age group                            | Age 0-39            | 0.93 (0.85 to 1.03)    | 0.1682              | 0.98 (0.86 to 1.10)   | 0.7158              | 0.86 (0.67 to 1.10) | 0.2259              |                     |        |
|                                      | Age 40-44           | 0.97 (0.88 to 1.08)    | 0.5673              | 1.00 (0.88 to 1.14)   | 0.949               | 0.82 (0.63 to 1.08) | 0.1609              |                     |        |
|                                      | Age 45-49           | 0.91 (0.84 to 0.99)    | 0.029               | 0.89 (0.80 to 0.99)   | 0.0275              | 0.80 (0.64 to 1.00) | 0.045               |                     |        |
|                                      | Age 50-54           | 0.94 (0.88 to 1.01)    | 0.0823              | 0.94 (0.86 to 1.02)   | 0.138               | 0.84 (0.70 to 0.99) | 0.0414              |                     |        |
|                                      | Age 55-59           | 0.94 (0.88 to 0.99)    | 0.0256              | 0.93 (0.87 to 1.00)   | 0.0533              | 0.88 (0.76 to 1.01) | 0.0777              |                     |        |
|                                      | Age 60-64           | 1                      |                     | 1                     |                     | 1                   |                     |                     |        |
|                                      | Age 65-69           | 1.08 (1.03 to 1.13)    | 0.0023              | 1.01 (0.95 to 1.08)   | 0.6797              | 1.00 (0.89 to 1.12) | 0.9494              |                     |        |
|                                      | Age 70-74           | 1.17 (1.12 to 1.22)    | <.0001              | 1.09 (1.03 to 1.16)   | 0.0033              | 1.04 (0.93 to 1.17) | 0.4875              |                     |        |
|                                      | Age 75-79           | 1.31 (1.25 to 1.37)    | <.0001              | 1.17 (1.10 to 1.24)   | <.0001              | 1.07 (0.95 to 1.20) | 0.2618              |                     |        |
|                                      | Age 80-84           | 1.50 (1.42 to 1.58)    | <.0001              | 1.24 (1.15 to 1.32)   | <.0001              | 1.09 (0.95 to 1.24) | 0.218               |                     |        |
| Gender                               | Age 85-89           | 1.65 (1.55 to 1.76)    | <.0001              | 1.40 (1.28 to 1.52)   | <.0001              | 1.24 (1.05 to 1.46) | 0.01                |                     |        |
|                                      | Age 90+             | 1.83 (1.64 to 2.04)    | <.0001              | 1.33 (1.12 to 1.57)   | 0.0013              | 1.04 (0.75 to 1.45) | 0.7991              |                     |        |
|                                      | Male                | 1.29 (1.26 to 1.32)    | <.0001              | 1.26 (1.22 to 1.30)   | <.0001              | 1.38 (1.29 to 1.47) | <.0001              |                     |        |
|                                      | Op group            | Resurfacing            | 1.03 (0.95 to 1.12) | 0.4289                | 1.05 (0.95 to 1.17) | 0.3131              | 0.69 (0.54 to 0.88) | 0.0024              |        |
|                                      |                     | Hybrid                 | 0.97 (0.94 to 1.01) | 0.1918                | 0.99 (0.94 to 1.05) | 0.8141              | 1.05 (0.95 to 1.16) | 0.3826              |        |
|                                      |                     | Not cemented           | 1.02 (0.99 to 1.05) | 0.2146                | 1.03 (0.98 to 1.07) | 0.2187              | 0.99 (0.91 to 1.07) | 0.7902              |        |
|                                      |                     | Cemented               | 1                   |                       | 1                   |                     | 1                   |                     |        |
|                                      |                     | SES quintile           | 1 (least deprived)  | 1                     |                     | 1                   |                     | 1                   |        |
|                                      |                     |                        | 2                   | 0.99 (0.95 to 1.02)   | 0.4819              | 1.01 (0.96 to 1.05) | 0.8082              | 0.98 (0.89 to 1.07) | 0.6485 |
|                                      | 3                   |                        | 1.07 (1.03 to 1.11) | 0.0002                | 1.07 (1.02 to 1.12) | 0.0065              | 0.99 (0.90 to 1.09) | 0.8011              |        |
| 4                                    | 1.09 (1.05 to 1.13) |                        | <.0001              | 1.12 (1.06 to 1.18)   | <.0001              | 1.12 (1.01 to 1.23) | 0.0246              |                     |        |
| 5 (most deprived)                    | 1.17 (1.12 to 1.22) |                        | <.0001              | 1.21 (1.14 to 1.28)   | <.0001              | 1.16 (1.04 to 1.29) | 0.0093              |                     |        |
| Number of prior emergency admissions | 0                   | 1                      |                     | 1                     |                     | 1                   |                     |                     |        |
|                                      | 1                   | 1.26 (1.21 to 1.31)    | <.0001              | 1.23 (1.16 to 1.30)   | <.0001              | 1.17 (1.06 to 1.30) | 0.0027              |                     |        |
|                                      | 2                   | 1.42 (1.31 to 1.53)    | <.0001              | 1.32 (1.18 to 1.47)   | <.0001              | 1.20 (0.97 to 1.47) | 0.0951              |                     |        |
|                                      | 3+                  | 2.33 (2.11 to 2.57)    | <.0001              | 1.78 (1.54 to 2.06)   | <.0001              | 1.45 (1.09 to 1.91) | 0.0104              |                     |        |
|                                      | White ethnicity     | 1                      |                     | 1                     |                     | 1                   |                     |                     |        |
| Mixed ethnicity                      | 0.82 (0.60 to 1.12) | 0.2089                 | 0.83 (0.56 to 1.24) | 0.3618                | 0.42 (0.14 to 1.27) | 0.1226              |                     |                     |        |
| Asian / Asian British                | 1.00 (0.85 to 1.18) | 0.9647                 | 0.89 (0.71 to 1.12) | 0.3286                | 0.91 (0.59 to 1.40) | 0.6739              |                     |                     |        |
| Black / Black British                | 1.13 (0.99 to 1.30) | 0.0667                 | 1.06 (0.88 to 1.26) | 0.5613                | 0.96 (0.66 to 1.39) | 0.8177              |                     |                     |        |
| Other ethnic group                   | 0.87 (0.72 to 1.06) | 0.1601                 | 0.89 (0.69 to 1.14) | 0.3518                | 0.89 (0.54 to 1.46) | 0.6356              |                     |                     |        |

|                                  |   |                     |        |                     |        |                     |        |
|----------------------------------|---|---------------------|--------|---------------------|--------|---------------------|--------|
| Not known or stated ethnic group |   | 0.69 (0.66 to 0.72) | <.0001 | 0.67 (0.63 to 0.72) | <.0001 | 0.61 (0.54 to 0.70) | <.0001 |
| RTT during index admission       |   | 1.80 (1.61 to 2.00) | <.0001 | 3.10 (2.71 to 3.54) | <.0001 | 5.35 (4.45 to 6.43) | <.0001 |
| Diabetes Mellitus                |   | 1.09 (1.05 to 1.14) | <.0001 | 1.05 (1.00 to 1.11) | 0.05   | 1.11 (1.01 to 1.22) | 0.0311 |
| Hypertension                     |   | 1.06 (1.03 to 1.09) | <.0001 | 1.06 (1.02 to 1.10) | 0.0008 | 1.17 (1.10 to 1.25) | <.0001 |
| Arrhythmias                      |   | 1.16 (1.12 to 1.21) | <.0001 | 1.07 (1.01 to 1.12) | 0.0235 | 1.09 (0.99 to 1.21) | 0.0885 |
| Valvular heart disease           |   | 1.08 (1.01 to 1.16) | 0.0165 | 1.05 (0.95 to 1.15) | 0.3423 | 0.99 (0.82 to 1.18) | 0.8755 |
| Congestive Heart Failure         |   | 1.07 (0.99 to 1.15) | 0.0999 | 0.93 (0.83 to 1.05) | 0.2286 | 0.78 (0.62 to 0.98) | 0.0366 |
| Peripheral Vascular Disease      |   | 1.27 (1.18 to 1.38) | <.0001 | 1.16 (1.04 to 1.30) | 0.01   | 1.05 (0.84 to 1.31) | 0.6758 |
| Chronic pulmonary disease        |   | 1.31 (1.27 to 1.35) | <.0001 | 1.28 (1.22 to 1.33) | <.0001 | 1.12 (1.03 to 1.22) | 0.0084 |
| Pulmonary Circulatory disease    |   | 1.14 (0.99 to 1.31) | 0.0593 | 1.06 (0.86 to 1.31) | 0.5691 | 1.23 (0.86 to 1.74) | 0.2559 |
| Metastases                       |   | 1.47 (1.25 to 1.74) | <.0001 | 0.73 (0.53 to 0.98) | 0.0388 | 0.83 (0.49 to 1.43) | 0.5034 |
| Renal disease                    |   | 1.08 (1.02 to 1.14) | 0.0061 | 0.89 (0.82 to 0.96) | 0.0045 | 0.90 (0.78 to 1.05) | 0.1804 |
| Dementia                         |   | 1.27 (1.10 to 1.47) | 0.0013 | 1.18 (0.95 to 1.48) | 0.142  | 1.57 (1.11 to 2.22) | 0.0113 |
| Psychoses                        |   | 1.51 (1.23 to 1.86) | <.0001 | 1.73 (1.33 to 2.25) | <.0001 | 1.83 (1.16 to 2.87) | 0.0091 |
| Alcohol abuse                    |   | 1.15 (1.05 to 1.26) | 0.0019 | 1.21 (1.07 to 1.36) | 0.0015 | 1.32 (1.07 to 1.63) | 0.0105 |
| Drug abuse                       |   | 1.15 (0.87 to 1.52) | 0.3246 | 1.33 (0.96 to 1.86) | 0.0905 | 2.22 (1.34 to 3.67) | 0.0019 |
| Depression                       |   | 1.24 (1.16 to 1.32) | <.0001 | 1.26 (1.16 to 1.37) | <.0001 | 1.52 (1.31 to 1.76) | <.0001 |
| Other mental health disorder     |   | 1.27 (1.14 to 1.41) | <.0001 | 1.20 (1.04 to 1.39) | 0.0154 | 1.38 (1.06 to 1.80) | 0.0158 |
| Living alone                     |   | 0.99 (0.9 to 1.08)  | 0.7603 | 1.04 (0.92 to 1.17) | 0.561  | 1.01 (0.80 to 1.26) | 0.9648 |
| Liver disease                    |   | 1.24 (1.09 to 1.41) | 0.001  | 1.27 (1.07 to 1.51) | 0.0054 | 1.51 (1.13 to 2.02) | 0.0051 |
| Peptic ulcer disease             |   | 1.16 (1.00 to 1.35) | 0.0547 | 1.22 (0.99 to 1.49) | 0.0592 | 1.25 (0.85 to 1.83) | 0.2596 |
| Paraplegia                       |   | 1.32 (1.10 to 1.57) | 0.0021 | 1.45 (1.14 to 1.84) | 0.0022 | 1.42 (0.92 to 2.19) | 0.1109 |
| Anaemia due to blood loss        |   | 0.77 (0.51 to 1.17) | 0.2165 | 0.76 (0.42 to 1.39) | 0.3731 | 0.78 (0.25 to 2.43) | 0.6712 |
| Iron deficiency anaemia          |   | 1.10 (1.01 to 1.19) | 0.0342 | 1.01 (0.89 to 1.14) | 0.91   | 0.81 (0.63 to 1.05) | 0.1109 |
| Coagulopathy                     |   | 1.61 (1.41 to 1.84) | <.0001 | 1.73 (1.45 to 2.06) | <.0001 | 1.21 (0.83 to 1.75) | 0.3225 |
| Recent weight loss               |   | 1.04 (0.87 to 1.23) | 0.6881 | 0.96 (0.75 to 1.23) | 0.7478 | 0.71 (0.41 to 1.24) | 0.2316 |
| Fluid balance abnormality        |   | 1.18 (1.10 to 1.27) | <.0001 | 1.03 (0.92 to 1.15) | 0.6481 | 1.03 (0.84 to 1.26) | 0.7874 |
| Hypothyroidism                   |   | 1.04 (0.99 to 1.09) | 0.0937 | 1.03 (0.97 to 1.10) | 0.3125 | 0.96 (0.85 to 1.09) | 0.5179 |
| Obesity                          |   | 1.14 (1.09 to 1.20) | <.0001 | 1.27 (1.19 to 1.35) | <.0001 | 1.46 (1.32 to 1.63) | <.0001 |
| Other neurological disorder      |   | 1.29 (1.20 to 1.39) | <.0001 | 1.23 (1.11 to 1.36) | <.0001 | 1.45 (1.21 to 1.72) | <.0001 |
| Rheumatological disorder         |   | 1.14 (1.08 to 1.20) | <.0001 | 1.14 (1.07 to 1.23) | 0.0002 | 1.23 (1.08 to 1.40) | 0.0021 |
| Previous pneumonia               |   | 1.00 (0.87 to 1.14) | 0.9777 | 0.94 (0.77 to 1.15) | 0.5561 | 1.16 (0.82 to 1.65) | 0.402  |
| Previous stroke                  |   | 0.82 (0.64 to 1.04) | 0.0963 | 0.62 (0.42 to 0.91) | 0.0156 | 0.49 (0.22 to 1.10) | 0.0853 |
| Previous AMI                     |   | 0.89 (0.70 to 1.14) | 0.3531 | 1.04 (0.74 to 1.45) | 0.8261 | 0.61 (0.27 to 1.37) | 0.234  |
| Cancer diagnosis                 |   | 1.00 (0.92 to 1.09) | 0.9936 | 0.95 (0.85 to 1.07) | 0.4233 | 0.96 (0.77 to 1.20) | 0.7221 |
| Index LOS in nights              | 0 | 1.50 (1.10 to 2.05) | 0.0103 | 1.08 (0.69 to 1.71) | 0.7318 | 1.30 (0.57 to 2.96) | 0.5323 |
|                                  | 1 | 1.06 (0.92 to 1.23) | 0.4362 | 0.95 (0.78 to 1.15) | 0.5898 | 0.94 (0.65 to 1.36) | 0.7419 |
|                                  | 2 | 1                   |        | 1                   |        | 1                   |        |
|                                  | 3 | 1.09 (1.03 to 1.16) | 0.0036 | 1.11 (1.03 to 1.20) | 0.0073 | 1.05 (0.91 to 1.22) | 0.5193 |
|                                  | 4 | 1.21 (1.14 to 1.28) | <.0001 | 1.17 (1.09 to 1.27) | <.0001 | 1.09 (0.94 to 1.26) | 0.2625 |
|                                  | 5 | 1.28 (1.20 to 1.36) | <.0001 | 1.20 (1.11 to 1.30) | <.0001 | 1.12 (0.96 to 1.31) | 0.1435 |

|  |     |                     |        |                     |        |                     |        |
|--|-----|---------------------|--------|---------------------|--------|---------------------|--------|
|  | 6   | 1.29 (1.21 to 1.38) | <.0001 | 1.18 (1.09 to 1.28) | 0.0001 | 1.22 (1.04 to 1.43) | 0.0159 |
|  | 7   | 1.46 (1.37 to 1.56) | <.0001 | 1.25 (1.15 to 1.37) | <.0001 | 1.43 (1.21 to 1.69) | <.0001 |
|  | 8   | 1.51 (1.41 to 1.63) | <.0001 | 1.32 (1.20 to 1.45) | <.0001 | 1.56 (1.30 to 1.86) | <.0001 |
|  | 9   | 1.63 (1.50 to 1.76) | <.0001 | 1.36 (1.22 to 1.51) | <.0001 | 1.77 (1.45 to 2.15) | <.0001 |
|  | 10  | 1.61 (1.47 to 1.76) | <.0001 | 1.32 (1.17 to 1.49) | <.0001 | 1.73 (1.39 to 2.15) | <.0001 |
|  | 11  | 1.56 (1.42 to 1.73) | <.0001 | 1.21 (1.06 to 1.39) | 0.0054 | 1.43 (1.11 to 1.85) | 0.0053 |
|  | 12  | 1.56 (1.40 to 1.73) | <.0001 | 1.16 (0.99 to 1.35) | 0.0605 | 1.45 (1.10 to 1.91) | 0.0082 |
|  | 13  | 1.62 (1.45 to 1.81) | <.0001 | 1.22 (1.04 to 1.44) | 0.0142 | 1.62 (1.22 to 2.14) | 0.0009 |
|  | 14  | 1.60 (1.43 to 1.80) | <.0001 | 1.07 (0.90 to 1.27) | 0.4283 | 1.25 (0.91 to 1.71) | 0.1695 |
|  | 15  | 1.57 (1.37 to 1.79) | <.0001 | 1.00 (0.82 to 1.22) | 0.9979 | 1.58 (1.14 to 2.19) | 0.0065 |
|  | 16  | 1.69 (1.46 to 1.96) | <.0001 | 1.03 (0.82 to 1.30) | 0.8029 | 1.45 (0.98 to 2.16) | 0.066  |
|  | 17  | 1.67 (1.41 to 1.97) | <.0001 | 1.14 (0.89 to 1.46) | 0.3026 | 1.61 (1.06 to 2.44) | 0.0261 |
|  | 18  | 1.80 (1.51 to 2.15) | <.0001 | 0.97 (0.73 to 1.30) | 0.8573 | 1.24 (0.76 to 2.04) | 0.3867 |
|  | 19  | 1.62 (1.33 to 1.97) | <.0001 | 1.06 (0.78 to 1.43) | 0.7135 | 1.79 (1.13 to 2.84) | 0.0135 |
|  | 20  | 1.43 (1.16 to 1.77) | 0.001  | 0.50 (0.32 to 0.77) | 0.0017 | 0.45 (0.18 to 1.10) | 0.0807 |
|  | 21+ | 1.90 (1.73 to 2.07) | <.0001 | 0.88 (0.77 to 1.02) | 0.0837 | 1.14 (0.89 to 1.45) | 0.3029 |

## **eAppendix 1. OPCS Procedure Codes Used to Identify Primary Total Hip Arthroplasty**

W371 (primary total prosthetic replacement of hip joint using cement), W381 (primary total prosthetic replacement of hip joint not using cement), W391 (primary total prosthetic replacement of hip joint not elsewhere coded (NEC)), W931 (primary hybrid prosthetic replacement of hip joint using cemented acetabular component), W941 (primary hybrid prosthetic replacement of hip joint using cemented femoral component), W951 (primary hybrid prosthetic replacement of hip joint using cement NEC) and W581 + Z843 (primary resurfacing of hip joint). Hip arthroplasty procedures were divided into the following subgroups: cemented, uncemented, hybrid and resurfacing.

## **eAppendix 2. Primary ICD-10 Diagnostic Codes Used to Define ‘Surgical’ Causes of Readmission**

Relevant T (complication) codes e.g. T84.0= ‘mechanical complication of internal joint prosthesis’ which includes dislocation, T84.5= ‘infection and inflammatory reaction due to internal joint prosthesis’, T81.3= ‘disruption of operation wound, not elsewhere classified’, T85= ‘complications of other internal prosthetic devices, implants and grafts’, T81.0= ‘haemorrhage and haematoma complicating a procedure NEC’, T81.3= ‘disruption of operation wound, not elsewhere classified’, T81.4= ‘infection following a procedure, not elsewhere classified’, T81.8= ‘other complications of procedures, not elsewhere classified’, relevant M (diseases of the musculoskeletal system) codes e.g. M79.8= ‘other specified soft tissue disorders’ which includes limb swelling, M79.6= ‘pain in limb’, M96.6= ‘fracture of bone following insertion of orthopaedic implant, joint prosthesis or bone plate’ and relevant R (symptom) codes e.g. R22.4= ‘localised swelling, mass and lump, lower limb’. Of note, thromboembolic complications (I codes) were not included in this category. If a patient presented with limb swelling or pain and was subsequently diagnosed with a DVT, infection, haematoma or any other defined condition, they would be given a primary ICD-10 code for that condition and not included in the ‘other specified soft tissue disorders’ (M79.8) or ‘pain in limb’ (M79.6) groups.
